# Supplementary material
Source: MDPI journal article supplement (https://www.mdpi.com/2073-4468/10/2/23)
Supplement: s1 [file s1]

**Table S1. Comparison of 10E8 and its variants.**

|                                         | 10E8                      | 10E8v4                                                                               | 10E8VLS (10E8v4-5R+100cF)                                                                                         | 10E8v4-100cW                                                                                         |
|-----------------------------------------|---------------------------|--------------------------------------------------------------------------------------|-------------------------------------------------------------------------------------------------------------------|------------------------------------------------------------------------------------------------------|
| Heavy chain                             | wt                        | Q3R, A61E, P62E, E64K, L72D, S74T, I75K, F77T, L82cV, M84T, S87T, L89Y, R105Q, T110I | Q3R, <b>V5R</b> , A61E, P62E, E64K, L72D, S74T, I75K, F77T, L82cV, M84T, S87T, L89Y, <b>S100cF</b> , R105Q, T110I | Q3R, A61E, P62E, E64K, L72D, S74T, I75K, F77T, L82cV, M84T, S87T, L89Y, <b>S100cW</b> , R105Q, T110I |
| Light chain                             | wt                        | S1A, Y2S, E7D, T8P, G9A, G15K, R16Q, I45V, V58I, S76T, D83E, E85D                    | S1A, Y2S, E7D, T8P, G9A, G15K, R16Q, I45V, V58I, S76T, D83E, E85D                                                 | S1A, Y2S, E7D, T8P, G9A, G15K, R16Q, I45V, V58I, S76T, D83E, E85D                                    |
| Geometric mean IC50 (IC80)( $\mu$ g/ml) | 0.315 (1.52) <sup>1</sup> | 0.329 (1.67) <sup>2</sup>                                                            | 0.044 (0.175) <sup>3</sup>                                                                                        | 0.011 (0.116) <sup>3</sup>                                                                           |
| Property                                | Sub-optimal solubility    | Solubility enhanced with the potency of 10E8 maintained                              | Potency and solubility enhanced, observed tissue reactogenicity in human trials                                   | Potency enhanced, not optimal physical characteristics                                               |
| Reference                               | Huang et al. (2012) [1]   | Kwon et al. (2016) [3]                                                               | Kwon et al. (2018) [2]                                                                                            | Kwon et al. (2018) [2]                                                                               |

Total number of viruses in panel: 200 study [1], 203 study [2], 208 study [3].

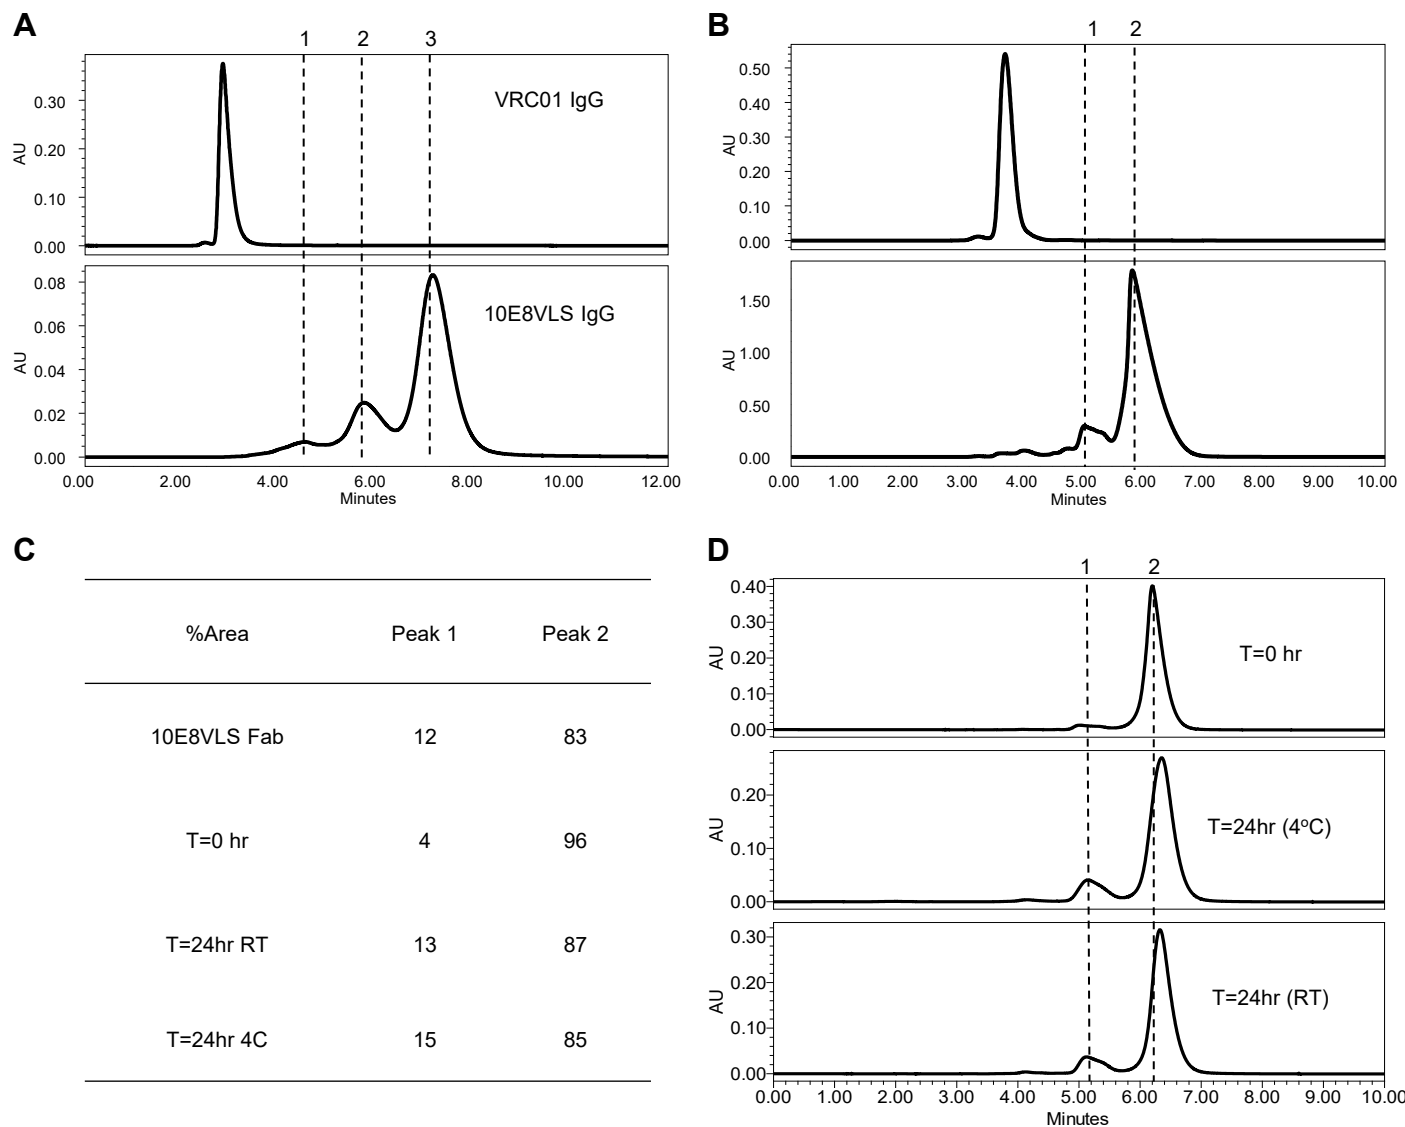

**Figure S1. Multi-Peak Population Profiles for 10E8VLS IgG and Fab.**

- (A) Comparison of VRC01 and 10E8VLS on platform SEC where all peaks are confirmed to be of monomer mass by SEC-MALS.
- (B) 10E8VLS Fab showed predominantly two peaks by SEC method, with Peak 2 the dominant peak. (percentage of less dominant peaks prior to Peak 1 (~5%) are not listed in the summary table).
- (C) Summary of 10E8VLS Fab percent distributions shown in Figures 3B and 3D.
- (D) SEC profile of time dependent re-assortment of fractionated 10E8VLS Fab Peak 2 after 24 hours at both 4°C and room temperature.

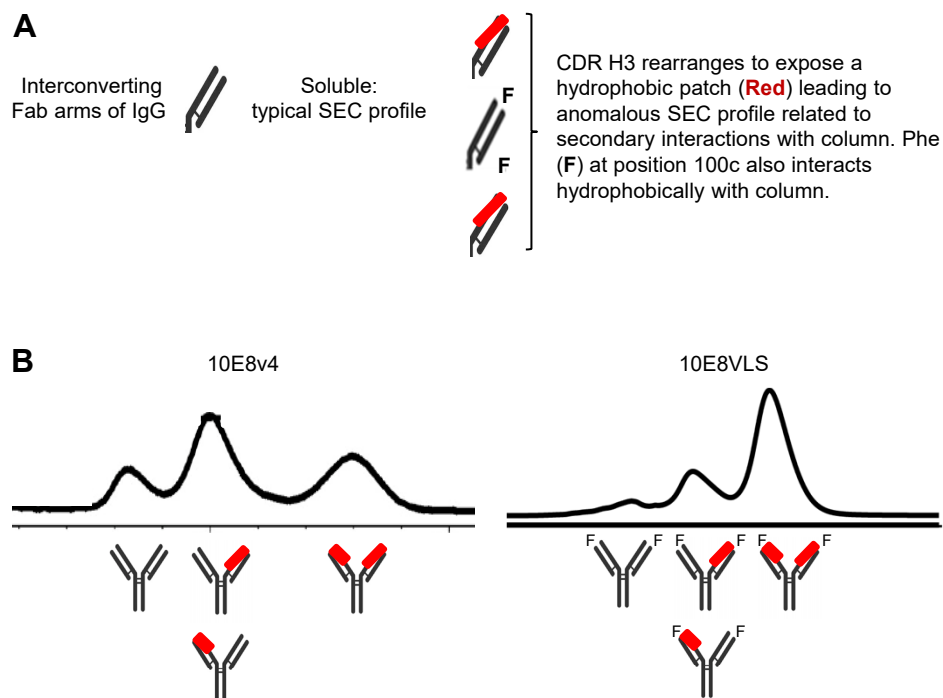

**Figure S2. Schematic of 10E8 IgG and Fab Conformations and Their SEC Profiles.**

- (A) Interconverting Fab conformations are shown, for a soluble conformation (black), with typical SEC profile and for a variant hydrophobic conformation (red); in both cases an additional Phe in the CDR H3 further enhanced hydrophobic interactions.
- (B) Three-peak population profiles of 10E8v4 and 10E8VLS are shown de-convoluted into molecular components.

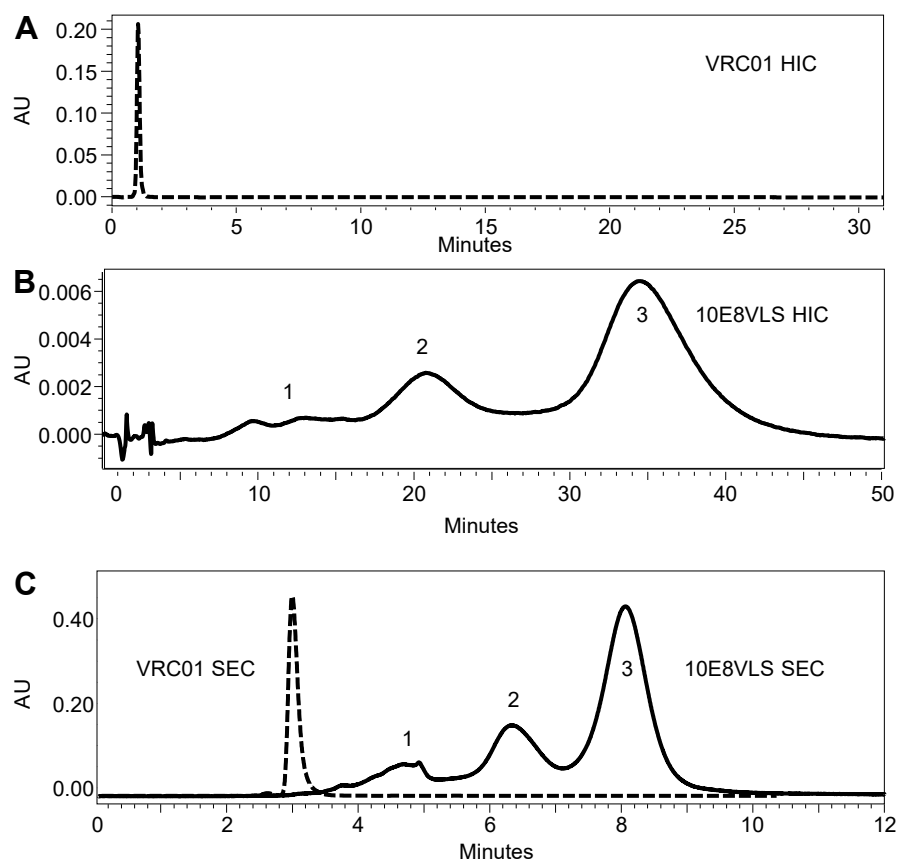

**Figure S3. Chromatographic Elution Profile of Antibody 10E8VLS by SEC and Optimized HIC.**  
 (A) VRC01 profile by HIC in dotted line: as a control, VRC01 eluted at the void time.  
 (B) 10E8VLS profile by HIC: three major peaks each eluted at different retention time.  
 (C) 10E8VLS (black line) and VRC01 (dotted line) profile by traditional SEC used as a reference in comparing with HIC profile.

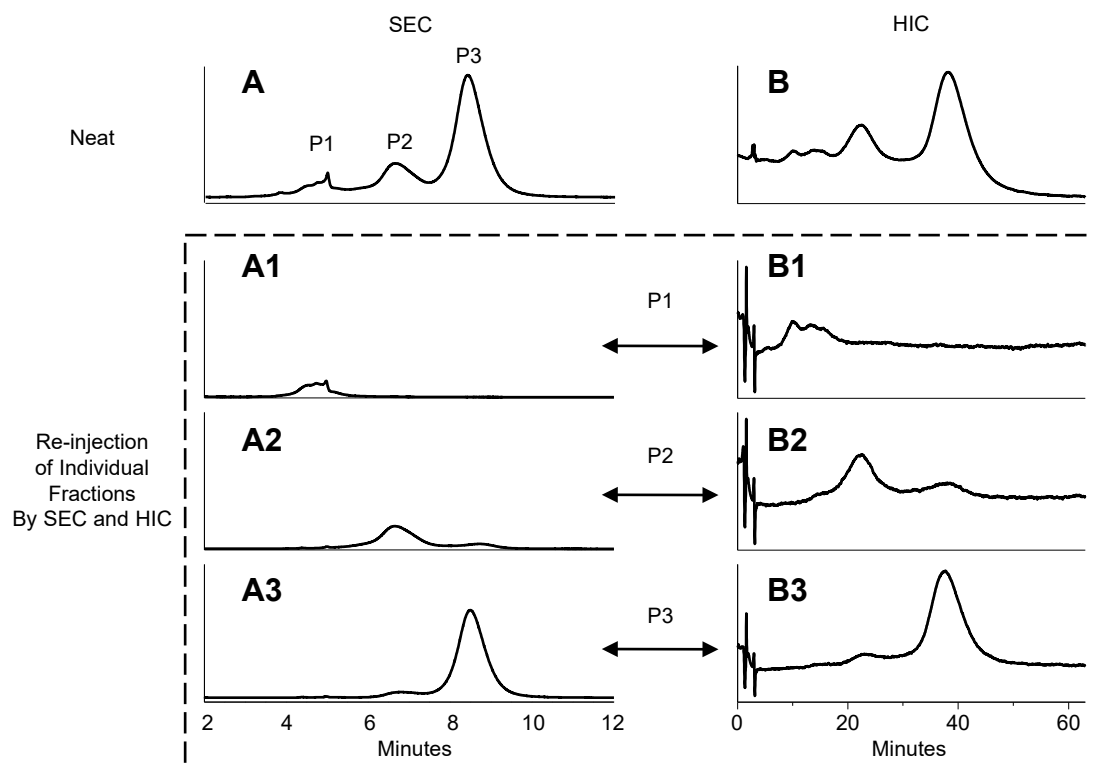

**Figure S4. SEC and HIC Profiles of Antibody 10E8VLS Correlate.**

(A) SEC profiles of neat injection of 10E8VLS.

(B) HIC profiles of neat injection of 10E8VLS. A1, A2 and A3: re-injection of SEC fractionated peaks 1, 2 and 3 back to platform SEC, three fractions were confirmed. B1, B2 and B3: re-injection of SEC fractionated peaks 1, 2, and 3 back to HIC.

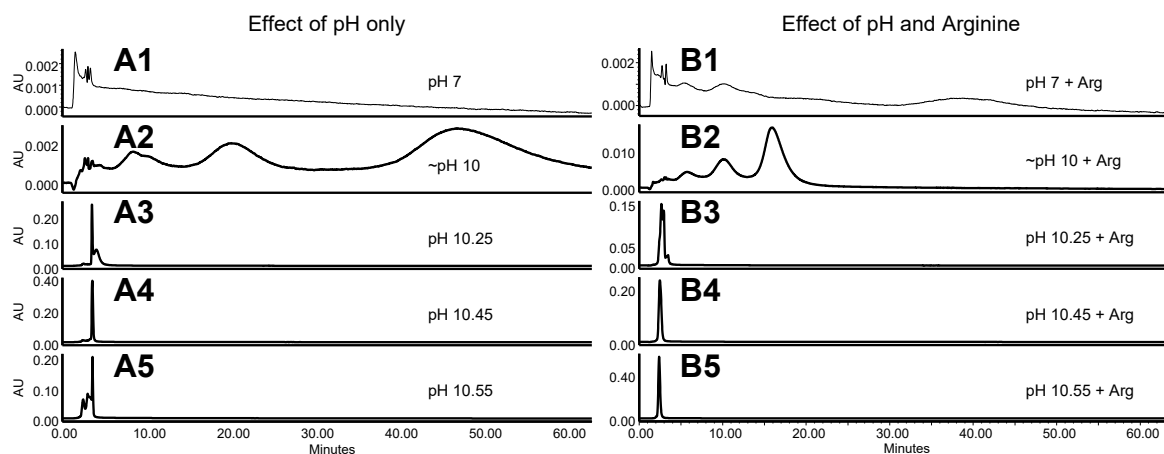

**Figure S5. Co-effects of high pH and arginine as modifiers on 10E8VLS HIC profile.**

(A1-A5) Hydrophobicity profiles of single factor pH only from pH 7 to pH 10.55

(B1-B5) The combined factors of 100mM arginine with different pH.

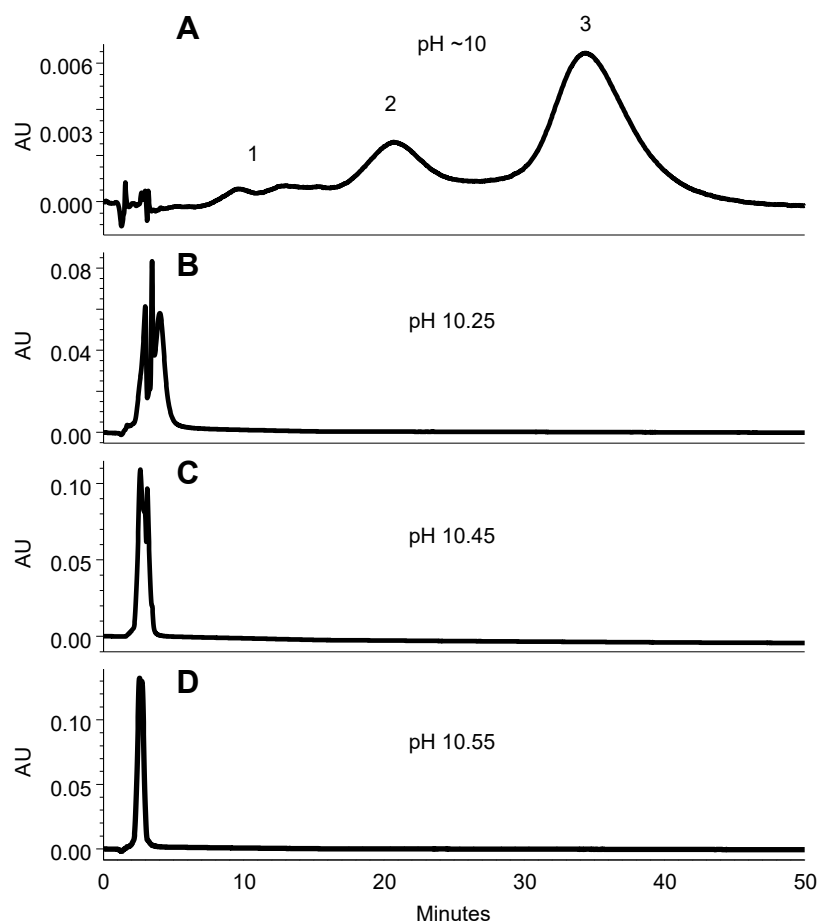

**Figure S6. Effect of different pHs on 10E8VLS HIC profiles in presence of 100 mM Arginine.**

(A) pH at ~10: three-peak profiles.

(B) pH at 10.25: three-peak merging started.

(C) pH at 10.45: peaks further merged.

(D) pH at 10.55, completely merging all monomeric peaks.

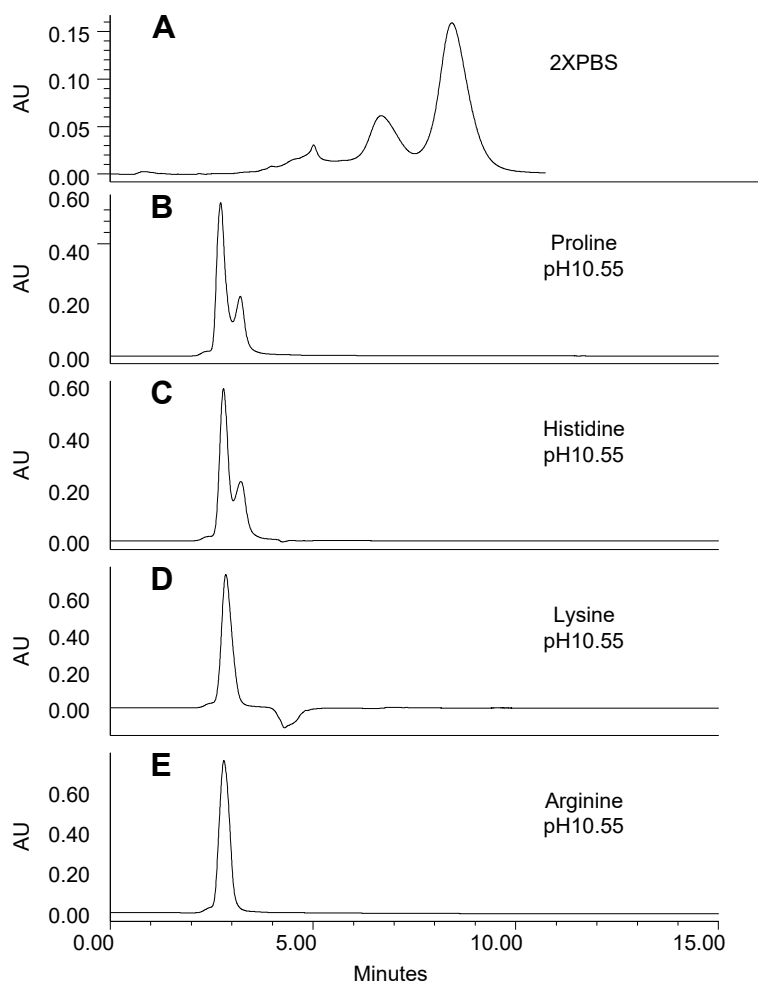

**Figure S7. Evaluations of different amino acids as modifiers in SEC mobile phase.**

From top to bottom, the mobile phases are:

(A) 2XPBS.

(B) 100 mM proline in 2X PBS pH10.55.

(C) 100 mM histidine in 2X PBS pH10.55.

(D) 100 mM lysine in 2X PBS pH10.55.

(E) 100 mM arginine in 2X PBS pH10.55.



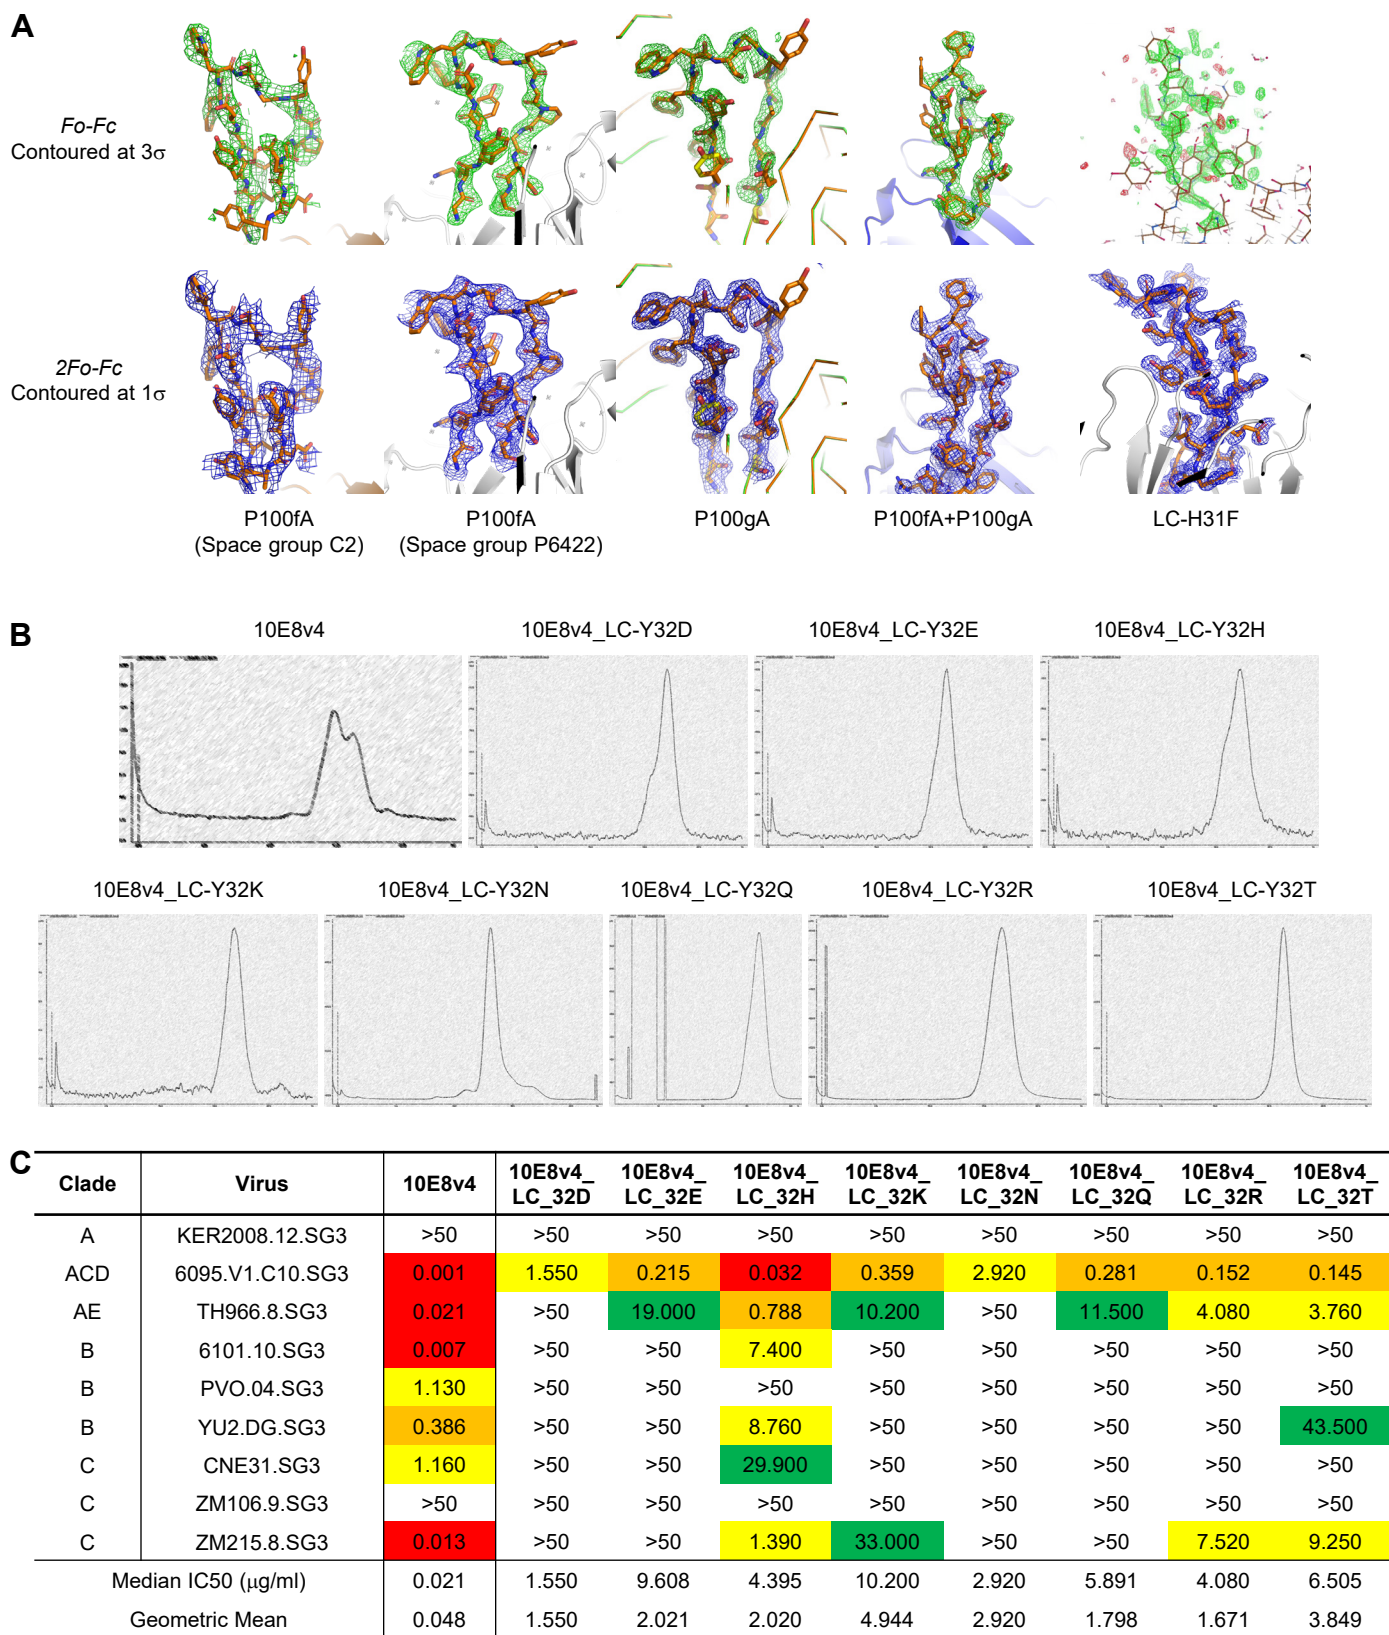

**Figure S8. The electron density maps of CDR H3s, SEC profiles, neutralization potency and breadth of 10E8v4\_LC\_32 variants.**

(A) Electron density maps. (Top row) *Fo-Fc* electron density maps of CDR H3 of 10E8v4 variants contoured at  $3\sigma$ . (Bottom row) *2Fo-Fc* electron density maps of CDR H3 of 10E8v4 variants contoured at  $1\sigma$ .  
 (B) Elution profiles of Superdex 200 increase 10/300 GL (GE Healthcare) size-exclusion chromatography column.  
 (C) Neutralization potency and breadth.

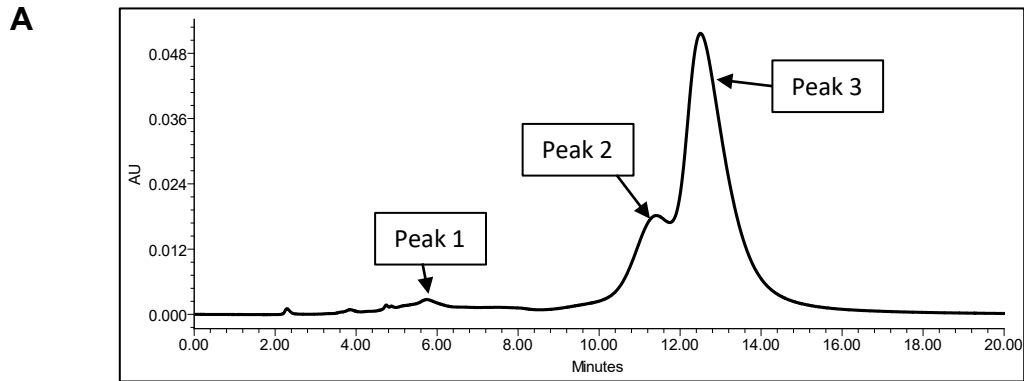

| Peak | Retention Time | Area    | % Area | Height |
|------|----------------|---------|--------|--------|
| 1    | 5.746          | 360196  | 6.35   | 2625   |
| 2    | 11.417         | 1209532 | 21.33  | 17993  |
| 3    | 12.505         | 4101617 | 72.32  | 51455  |

**B**

| Clade | Virus          | 10E8v4-100cW |       | 10E8v4-100cW-100fA |       | 10E8v4-100cW-100gA |        | 10E8v4-100cW-100fgAA |      |
|-------|----------------|--------------|-------|--------------------|-------|--------------------|--------|----------------------|------|
|       |                | IC50         | IC80  | IC50               | IC80  | IC50               | IC80   | IC50                 | IC80 |
| A     | KER2008.12.SG3 | 25.9         | >50   | >50                | >50   | >50                | >50    | >50                  | >50  |
| A     | RW020.2.SG3    | 0.027        | 0.165 | 0.678              | 5.71  | >50                | >50    | >50                  | >50  |
| AE    | CM244.ec1.SG3  | 0.005        | 0.081 | >50                | >50   | >50                | >50    | >50                  | >50  |
| B     | CAAN.A2.SG3    | 0.197        | 1.00  | >50                | >50   | >50                | >50    | >50                  | >50  |
| B     | PVO.04.SG3     | 0.049        | 0.328 | 0.263              | 1.66  | 16.6               | >50    | >50                  | >50  |
| B     | YU2.DG.SG3     | 0.038        | 0.349 | 0.133              | 1.16  | 6.64               | >50    | 24.4                 | >50  |
| C     | CNE31.SG3      | 0.078        | 0.235 | 0.287              | 0.901 | 10.5               | 17.5   | >50                  | >50  |
| C     | ZM106.9.SG3    | >50          | >50   | >50                | >50   | >50                | >50    | >50                  | >50  |
| C     | ZM55.28a.SG3   | 0.150        | 0.508 | 0.340              | 1.10  | 11.8               | 31.1   | >50                  | >50  |
|       | Median         | 0.064        | 0.328 | 0.287              | 1.160 | 11.150             | 24.300 | 24.400               | >50  |
|       | Geometric Mean | 0.105        | 0.292 | 0.297              | 1.612 | 10.810             | 23.329 | 24.400               | >50  |

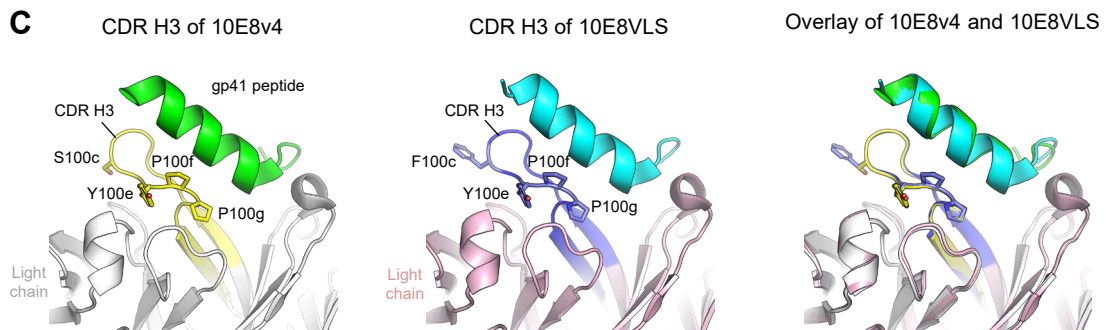

**Figure S9. Proline to Ala mutations in the YPP motif similarly affected the potency of 10E8v4-100cW variants as the mutations affected the potency of 10E8v4.**

(A) The SEC profile of 10E8v4-100cW.

(B) Neutralization potency and breadth of 10E8v4-100cW variants with Pro to Ala mutations.

(C) Comparison of the YPP domain of 10E8v4 and 10E8VLS.

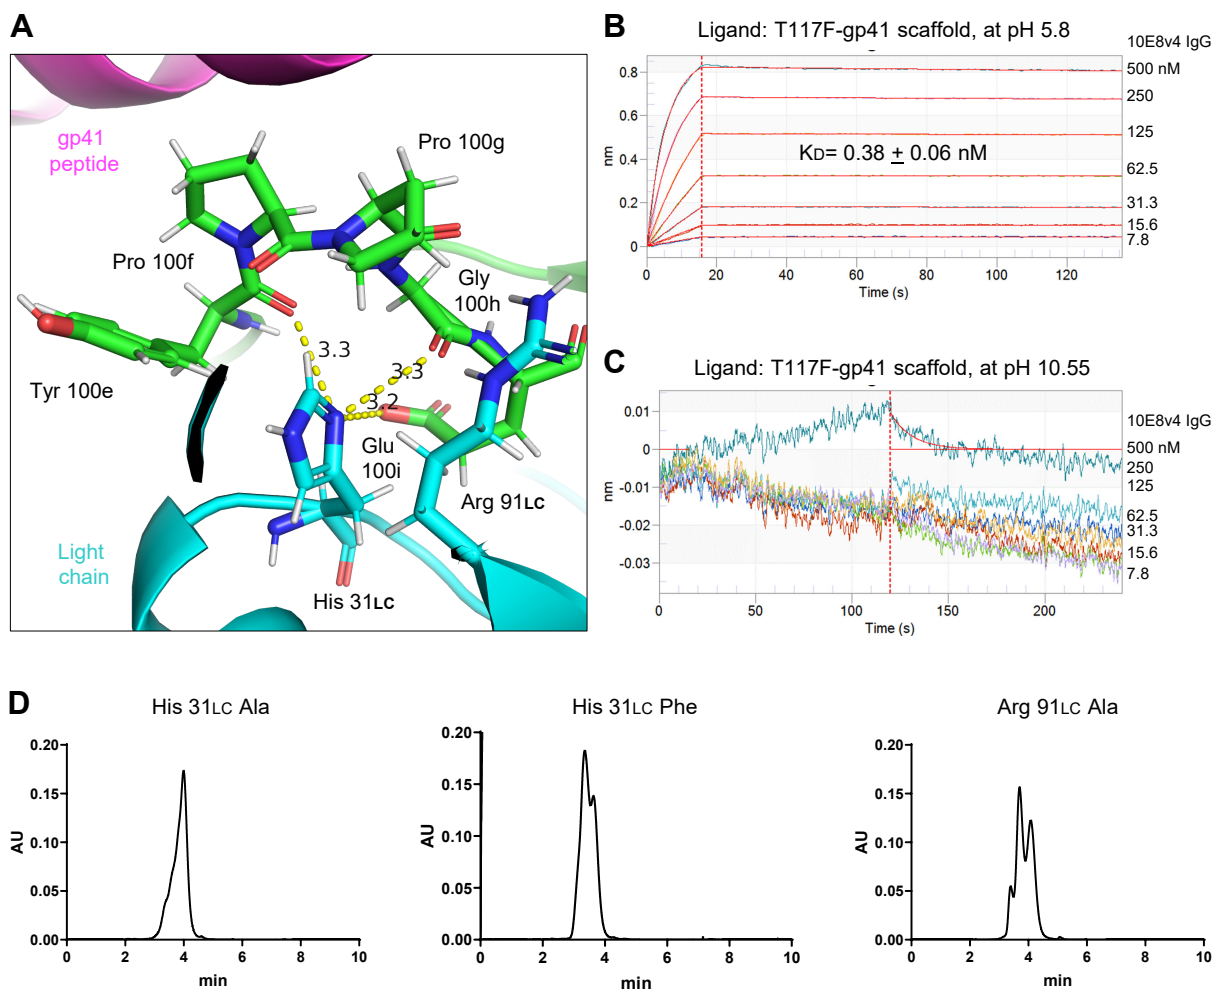

**Figure S10. Interaction between the YPP motif of 10E8v4 and its light chain, its binding kinetics to a gp41 scaffold and the SEC profiles of light chain variants.**

(A) Close-up view of the YPP motif of 10E8 in complex with gp41 peptide.

(B) 10E8v4 IgG binding to gp41 scaffold, T117-F at pH 5.8 by BLI.

(C) 10E8v4 IgG binding to gp41 scaffold, T117-F at pH 10.5 in the presence of 100 mM Arg by BLI.

(D) SEC profiles of 10E8v4 light chain variants.
